# Supplementary material for: Anti-thymocyte globulin/G-CSF treatment preserves β cell function in patients with established type 1 diabetes
Source: JCI journal article supplement (doi:10.1172/jci78492), 2014-12-14
Supplement: sd2 [file 2]

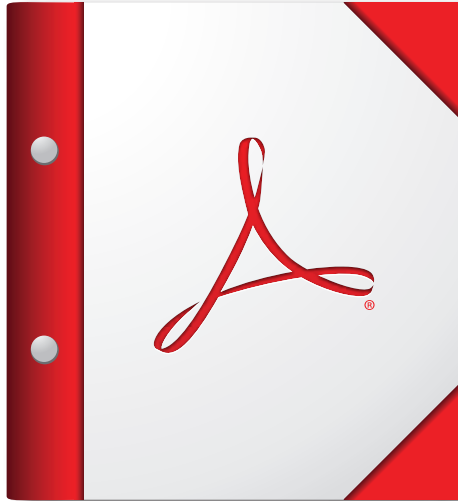

**For the best experience, open this PDF portfolio in  
Acrobat 9 or Adobe Reader 9, or later.**

**Get Adobe Reader Now!**
